# Supplementary material
Source: PubMed Central journal article supplement (PMC6768422)
Supplement: NIHMS1001269-supplement-ESI.pdf [file NIHMS1001269-supplement-ESI.pdf]

**Electronic Supplementary Information for**  
***Revealing quantum mechanical effects in enzyme catalysis with large-scale electronic structure simulation***

Zhongyue Yang<sup>1</sup>, Rimsha Mehmood<sup>1,2</sup>, Mengyi Wang<sup>1,3</sup>, Helena W. Qi<sup>1,2</sup>, Adam H. Steeves<sup>1</sup>,  
and Heather J. Kulik<sup>1,\*</sup>

<sup>1</sup>*Department of Chemical Engineering, Massachusetts Institute of Technology, Cambridge, MA 02139*

<sup>2</sup>*Department of Chemistry, Massachusetts Institute of Technology, Cambridge, MA 02139*

<sup>3</sup>*Department of Materials Science and Engineering, Massachusetts Institute of Technology, Cambridge, MA 02139*

**Contents**

|                                                                                        |          |
|----------------------------------------------------------------------------------------|----------|
| <b>Table S1</b> Missing residues in DNMT1 added using Modeller                         | Page S2  |
| <b>Table S2</b> Residue protonation states in DNMT1                                    | Page S3  |
| <b>Table S3</b> Residue protonation states in CutC                                     | Page S4  |
| <b>Table S4</b> Overall charge assignment to DNMT1                                     | Page S7  |
| <b>Table S5</b> Overall charge assignment to CutC                                      | Page S7  |
| <b>Table S6</b> ZAFF charges assigned to zinc sites in DNMT1                           | Page S7  |
| <b>Table S7</b> QM region before and after CSA along with large cluster region         | Page S8  |
| <b>Table S8</b> Isolated choline intermediate energetics                               | Page S10 |
| <b>Figure S1</b> Isolated choline intermediate skeleton structures                     | Page S10 |
| <b>Figure S2</b> Sampled choline dihedrals during CutC MD                              | Page S11 |
| <b>Figure S3</b> E491-Cho and C489-Cho distances sampled during CutC MD                | Page S12 |
| <b>Figure S4</b> Ranked charge shifts in CutC                                          | Page S13 |
| <b>Figure S5</b> Additional forced Choline deprotonation geometric properties from SMD | Page S14 |
| <b>Figure S6</b> Forced TMA protonation geometric properties from SMD                  | Page S15 |
| <b>Figure S7</b> Forced TMA protonation spins during SMD                               | Page S16 |
| <b>Figure S8</b> Forced TMA protonation charges during SMD                             | Page S16 |
| <b>Table S9</b> Close contact list, distances, and interaction strengths               | Page S17 |
| <b>Text S1</b> More details about close contact analysis                               | Page S17 |
| <b>Figure S9</b> Bond lengths sampled during MD for Zn2                                | Page S18 |
| <b>Table S10</b> Definition of QM region for Zn2 in DNMT                               | Page S19 |
| <b>Figure S10</b> Structures of QM region for Zn2 in DNMT                              | Page S20 |
| <b>Table S11</b> Mulliken partial charges for CSA in DNMT                              | Page S21 |

**Table S1.** Missing Residues in DNMT1 added using Modeller.

| Residue |      | Residue |      |
|---------|------|---------|------|
| Name    | #    | Name    | #    |
| SER     | 645  | LYS     | 1115 |
| ASN     | 646  | GLY     | 1116 |
| GLU     | 852  | LYS     | 1117 |
| SER     | 853  | GLY     | 1118 |
| LEU     | 854  | LYS     | 1119 |
| LEU     | 855  | PRO     | 1120 |
| GLU     | 856  | LYS     | 1121 |
| GLY     | 857  | SER     | 1122 |
| ASP     | 858  | GLN     | 1123 |
| ASP     | 859  | ALA     | 1124 |
| VAL     | 956  | CYS     | 1125 |
| LYS     | 957  | GLU     | 1126 |
| ARG     | 958  | PRO     | 1127 |
| PRO     | 959  | SER     | 1128 |
| ARG     | 960  | GLU     | 1129 |
| ASP     | 978  | PRO     | 1130 |
| TYR     | 979  | GLU     | 1131 |
| ILE     | 980  | ILE     | 1132 |
| LYS     | 981  | GLU     | 1133 |
| GLY     | 982  | ILE     | 1134 |
| SER     | 983  | GLU     | 1480 |
| ASN     | 1108 | ALA     | 1481 |
| LYS     | 1109 | GLY     | 1482 |
| GLY     | 1110 | LYS     | 1483 |
| LYS     | 1111 |         |      |
| GLY     | 1112 |         |      |
| LYS     | 1113 |         |      |
| GLY     | 1114 |         |      |

**Table S2.** Residue protonation states in DNMT1. If the residue is neutral, no value is indicated. The residues coordinated to Zn<sup>2+</sup> ions were manually assigned charges and are shown in bold.

|              |    |               |    |        |    |        |    |        |    |        |    |        |    |        |    |        |    |               |    |        |    |
|--------------|----|---------------|----|--------|----|--------|----|--------|----|--------|----|--------|----|--------|----|--------|----|---------------|----|--------|----|
| SER5         |    | ALA97         |    | HIE189 |    | VAL281 |    | ASP373 | -1 | SER465 |    | LEU557 |    | ARG649 | +1 | ALA741 |    | ARG833        | +1 | LEU925 |    |
| ASN6         |    | VAL98         |    | SER190 |    | LEU282 |    | ILE374 |    | PRO466 |    | VAL558 |    | MET650 |    | SER742 |    | GLY834        |    | PHE926 |    |
| ALA7         |    | LYS99         | +1 | LYS191 | +1 | TYR283 |    | LYN375 |    | GLY467 |    | MET559 |    | GLY651 |    | ALA743 |    | VAL835        |    | GLY927 |    |
| PHE8         |    | THR100        |    | VAL192 |    | TYR284 |    | ILE376 |    | ASN468 |    | ALA560 |    | TYR652 |    | LEU744 |    | <b>CY3836</b> |    | ASN928 |    |
| LYS9         | +1 | ASP101        | -1 | LYS193 | +1 | SER285 |    | ARG377 | +1 | LYS469 | +1 | GLY561 |    | GLN653 |    | GLU745 | -1 | SER837        |    | ILE929 |    |
| ARG10        | +1 | GLY102        |    | VAL194 |    | ALA286 |    | VAL378 |    | GLY470 |    | GLU562 | -1 | CYS654 |    | ILE746 |    | <b>CY3838</b> |    | LEU930 |    |
| ARG11        | +1 | LYS103        | +1 | ILE195 |    | THR287 |    | ASN379 |    | LYS471 | +1 | THR563 |    | THR655 |    | SER747 |    | VAL839        |    | ASP931 | -1 |
| ARG12        | +1 | LYS104        | +1 | TYR196 |    | LYS288 | +1 | LYS380 | +1 | GLY472 |    | THR564 |    | PHE656 |    | TYR748 |    | GLU840        | -1 | LYS932 | +1 |
| <b>CY113</b> |    | SER105        |    | LYS197 | +1 | ASN289 |    | PHE381 |    | LYS473 | +1 | ASN565 |    | GLY657 |    | ASN749 |    | ALA841        |    | HID933 |    |
| GLY14        |    | TYR106        |    | ALA198 |    | GLY290 |    | TYR382 |    | GLY474 |    | SER566 |    | VAL658 |    | GLY750 |    | GLY842        |    | ARG934 |    |
| VAL15        |    | TYR107        |    | PRO199 |    | ILE291 |    | ARG383 | +1 | LYS475 | +1 | ARG567 | +1 | LEU659 |    | GLU751 | -1 | LYS843        | +1 | TRP935 |    |
| <b>CY116</b> |    | LYS108        | +1 | SER200 |    | LEU292 |    | PRO384 |    | GLY476 |    | GLY568 |    | GLN660 |    | PRO752 |    | ALA844        |    | VAL936 |    |
| GLU17        |    | LYS109        | +1 | GLU201 | -1 | TYR293 |    | GLU385 | -1 | LYS477 | +1 | GLN569 |    | ALA661 |    | GLN753 |    | <b>CY3845</b> |    | GLY937 |    |
| VAL18        |    | VAL110        |    | ASN202 |    | ARG294 | +1 | ASN386 |    | GLY478 |    | ARG570 | +1 | GLY662 |    | SER754 |    | ASP846        | -1 | ASN938 |    |
| <b>CY119</b> |    | CYS111        |    | TRP203 |    | VAL295 |    | THR387 |    | LYS479 | +1 | LEU571 |    | GLN663 |    | TRP755 |    | PRO847        |    | ALA939 |    |
| GLN20        |    | ILE112        |    | ALA204 |    | GLY296 |    | HIE388 |    | PRO480 |    | PRO572 |    | TYR664 |    | PHE756 |    | ALA848        |    | VAL940 |    |
| GLN21        |    | ASP113        | -1 | MET205 |    | ASP297 | -1 | LYS389 | +1 | LYS481 | +1 | GLN573 |    | GLY665 |    | GLN757 |    | ALA849        |    | PRO941 |    |
| PRO22        |    | ALA114        |    | GLU206 | -1 | GLY298 |    | SER390 |    | SER482 |    | LYN574 |    | VAL666 |    | ARG758 | +1 | ARG850        | +1 | PRO942 |    |
| GLU23        | -1 | GLU115        | -1 | GLY207 |    | VAL299 |    | THR391 |    | GLN483 |    | GLY575 |    | ALA667 |    | GLN759 |    | GLN851        |    | PRO943 |    |
| <b>CY124</b> |    | THR116        |    | GLY208 |    | TYR300 |    | PRO392 |    | ALA484 |    | ASP576 | -1 | GLN668 |    | LEU760 |    | PHE852        |    | LEU944 |    |
| GLY25        |    | LEU117        |    | MET209 |    | LEU301 |    | ALA393 |    | CYS485 |    | VAL577 |    | THR669 |    | ARG761 | +1 | ASN853        |    | ALA945 |    |
| LYS26        | +1 | GLU118        | -1 | ASP210 | -1 | PRO302 |    | SER394 |    | GLU486 | -1 | GLU578 | -1 | ARG670 | +1 | GLY762 |    | THR854        |    | LYS946 | +1 |
| <b>CY127</b> |    | VAL119        |    | PRO211 |    | PRO303 |    | TYR395 |    | PRO487 |    | MET579 |    | ARG671 | +1 | ALA763 |    | LEU855        |    | ALA947 |    |
| LYS28        | +1 | GLY120        |    | GLU212 | -1 | GLU304 | -1 | HIE396 |    | SER488 |    | LEU580 |    | ARG672 | +1 | GLN764 |    | ILE856        |    | ILE948 |    |
| ALA29        |    | ASP121        | -1 | SER213 |    | ALA305 |    | ALA397 |    | GLU489 | -1 | CYS581 |    | ALA673 |    | TYR765 |    | PRO857        |    | GLY949 |    |
| <b>CY130</b> |    | CYS122        |    | LEU214 |    | PHE306 |    | ASP398 | -1 | PRO490 |    | ILE582 |    | GLN764 |    | GLN766 |    | TRP858        |    | LEU950 |    |
| LYS31        | +1 | VAL123        |    | LEU215 |    | THR307 |    | ILE399 |    | GLU491 | -1 | GLY583 |    | ILE675 |    | PRO767 |    | CYS859        |    | GLU951 | -1 |
| ASP32        | -1 | SER124        |    | GLH216 |    | PHE308 |    | ASN400 |    | ILE492 |    | PRO584 |    | LEU676 |    | ILE768 |    | LEU860        |    | ILE952 |    |
| MET33        |    | ILE125        |    | GLY217 |    | ASN309 |    | LEU401 |    | GLU493 | -1 | PRO585 |    | ALA677 |    | LEU769 |    | PRO861        |    | LYS953 | +1 |
| VAL34        |    | ILE126        |    | ASP218 | -1 | ILE310 |    | LEU402 |    | ILE494 |    | CYS586 |    | ALA678 |    | ARG770 | +1 | <b>HD1862</b> |    | LEU954 |    |
| LYS35        | +1 | PRO127        |    | ASP219 | -1 | LYS311 | +1 | TYR403 |    | LYS495 | +1 | GLN587 |    | ALA679 |    | ASP771 | -1 | THR863        |    | CYS955 |    |
| PHE36        |    | ASP128        | -1 | GLY220 |    | LEU312 |    | TRP404 |    | LEU496 |    | GLY588 |    | PRO680 |    | HIE772 |    | GLY864        |    | MET956 |    |
| GLY37        |    | ASP129        | -1 | LYS221 | +1 | SER313 |    | SER405 |    | PRO497 |    | PHE589 |    | GLY681 |    | ILE773 |    | ASN865        |    | LEU957 |    |
| GLY38        |    | SER130        |    | THR222 |    | SER314 |    | ASP406 | -1 | LYS498 | +1 | SER590 |    | GLU682 | -1 | CYS774 |    | ARG866        | +1 | ALA958 |    |
| SER39        |    | SER131        |    | TYR223 |    | PRO315 |    | GLU407 | -1 | LEU499 |    | GLY591 |    | LYS683 | +1 | LYS775 | +1 | HIE867        |    | LYS959 | +1 |
| GLY40        |    | LYS132        | +1 | PHE224 |    | VAL316 |    | GLU408 | -1 | ARG500 | +1 | MET592 |    | LEU684 |    | ASP776 | -1 | ASN868        |    | ALA960 |    |
| ARG41        | +1 | PRO133        |    | TYR225 |    | LYS317 | +1 | ALA409 |    | THR501 |    | ASN593 |    | PRO685 |    | MET777 |    | HIE869        |    |        |    |
| SER42        |    | LEU134        |    | GLN226 |    | ARG318 | +1 | VAL410 |    | LEU502 |    | ARG594 | +1 | LEU686 |    | SER778 |    | TRP870        |    |        |    |
| LYS43        | +1 | TYR135        |    | LEU227 |    | PRO319 |    | VAL411 |    | ASH503 |    | PHE595 |    | PHE687 |    | ALA779 |    | ALA871        |    |        |    |
| GLN44        |    | LEU136        |    | TRP228 |    | ARG320 | +1 | ASP412 | -1 | VAL504 |    | ASN596 |    | PRO688 |    | LEU780 |    | GLY872        |    |        |    |
| ALA45        |    | ALA137        |    | TYR229 |    | LYS321 | +1 | PHE413 |    | PHE505 |    | SER597 |    | GLU689 | -1 | VAL781 |    | LEU873        |    |        |    |
| <b>CY146</b> |    | ARG138        | +1 | ASP230 | -1 | GLU322 | -1 | LYS414 | +1 | SER506 |    | ARG598 | +1 | PRO690 |    | ALA782 |    | TYR874        |    |        |    |
| GLN47        |    | VAL139        |    | GLN231 |    | PRO323 |    | ALA415 |    | GLY507 |    | THR599 |    | LEU691 |    | ALA783 |    | GLY875        |    |        |    |
| GLU48        | -1 | THR140        |    | ASP232 | -1 | VAL324 |    | VAL416 |    | CYS508 |    | TYR600 |    | HID692 |    | ARG784 | +1 | ARG876        | +1 |        |    |
| ARG49        | +1 | ALA141        |    | TYR233 |    | ASP325 | -1 | GLN417 |    | GLY509 |    | SER601 |    | VAL693 |    | MET785 |    | LEU877        |    |        |    |
| ARG50        | +1 | LEU142        |    | ALA234 |    | GLU326 | -1 | GLY418 |    | GLY510 |    | LYN602 |    | PHE694 |    | ARG786 | +1 | GLU878        | -1 |        |    |
| <b>CY151</b> |    | TRP143        |    | ARG235 | +1 | ASP327 | -1 | ARG419 | +1 | LEU511 |    | PHE603 |    | ALA695 |    | HIE787 |    | TRP879        |    |        |    |
| PRO52        |    | GLU144        | -1 | PHE236 |    | LEU328 |    | CYS420 |    | SER512 |    | LYN604 |    | PRO696 |    | ILE788 |    | ASP880        | -1 |        |    |
| ASN53        |    | ASP145        | -1 | GLU237 | -1 | TYR329 |    | THR421 |    | GLU513 | -1 | ASN605 |    | ARG697 | +1 | PRO789 |    | GLY881        |    |        |    |
| MET54        |    | SER146        |    | SER238 |    | PRO330 |    | VAL422 |    | GLY514 |    | SER606 |    | ALA698 |    | LEU790 |    | PHE882        |    |        |    |
| ALA55        |    | SER147        |    | PRO239 |    | GLU331 | -1 | GLU423 | -1 | PHE515 |    | LEU607 |    | CYS699 |    | ALA791 |    | PHE883        |    |        |    |
| MET56        |    | ASN148        |    | PRO240 |    | HIE332 |    | TYR424 |    | HID516 |    | VAL608 |    | GLN700 |    | PRO792 |    | SER884        |    |        |    |
| LYS57        | +1 | GLY149        |    | LYS241 | +1 | TYR333 |    | GLY425 |    | GLN517 |    | VAL609 |    | LEU701 |    | GLY793 |    | THR885        |    |        |    |
| GLU58        | -1 | GLN150        |    | THR242 |    | ARG334 | +1 | GLU426 | -1 | ALA518 |    | SER610 |    | SER702 |    | SER794 |    | THR886        |    |        |    |
| ALA59        |    | MET151        |    | GLN243 |    | LYS335 | +1 | ASP427 | -1 | GLY519 |    | PHE611 |    | VAL703 |    | ASP795 | -1 | VAL887        |    |        |    |
| ASH60        |    | PHE152        |    | PRO244 |    | TYR336 |    | LEU428 |    | ILE520 |    | LEU612 |    | VAL704 |    | TRP796 |    | THR888        |    |        |    |
| ASP61        | -1 | <b>HD1153</b> |    | THR245 |    | SER337 |    | PRO429 |    | SER521 |    | SER613 |    | VAL705 |    | ARG797 | +1 | ASN889        |    |        |    |
| ASP62        | -1 | ALA154        |    | GLU246 | -1 | ASP338 | -1 | GLU430 | -1 | ASP522 | -1 | TYR614 |    | ASP706 | -1 | ASH798 |    | PRO890        |    |        |    |
| GLU63        | -1 | HIE155        |    | ASP247 | -1 | TYR339 |    | CYS431 |    | THR523 |    | CYS615 |    | ASP707 | -1 | LEU799 |    | GLU891        | -1 |        |    |
| GLU64        | -1 | TRP156        |    | ASN248 |    | ILE340 |    | VAL432 |    | LEU524 |    | ASH616 |    | LYS708 | +1 | PRO800 |    | PRO892        |    |        |    |
| VAL65        |    | PHE157        |    | LYS249 | +1 | LYS341 | +1 | GLN433 |    | TRP525 |    | TYR617 |    | LYS709 | +1 | ASN801 |    | MET893        |    |        |    |
| ASH66        |    | CYS158        |    | PHE250 |    | GLY342 |    | VAL434 |    | ALA526 |    | TYR618 |    | PHE710 |    | ILE802 |    | GLY894        |    |        |    |
| ASP67        | -1 | ALA159        |    | LYS251 | +1 | SER343 |    | TYR435 |    | ILE527 |    | ARG619 | +1 | VAL711 |    | GLU803 | -1 | LYN895        |    |        |    |
| ASN68        |    | GLY160        |    | PHE252 |    | ASN344 |    | SER436 |    | GLU528 | -1 | PRO620 |    | SER712 |    | VAL804 |    | GLN896        |    |        |    |

**Table S2 (continued).** Residue protonation states in DNMT1. If the residue is neutral, no value is indicated. The residues coordinated to Zn<sup>2+</sup> ions were manually assigned charges and are shown in bold.

|       |        |               |        |        |        |        |        |        |        |        |        |        |        |        |
|-------|--------|---------------|--------|--------|--------|--------|--------|--------|--------|--------|--------|--------|--------|--------|
| ILE69 | THR161 | <b>CY3253</b> | LEU345 | MET437 | MET529 | ARG621 | +1     | ASN713 | ARG805 | +1     | GLY897 |        |        |        |
| PRO70 | ASP162 | -1            | VAL254 | ASP346 | -1     | GLY438 | TRP530 | PHE622 | ILE714 | LEU806 | ARG898 | +1     |        |        |
| GLU71 | -1     | THR163        | SER255 | ALA347 | GLY439 | ASP531 | -1     | PHE623 | THR715 | SER807 | VAL899 |        |        |        |
| MET72 | VAL164 | <b>CY3256</b> | PRO348 | PRO440 | PRO532 | LEU624 | ARG716 | +1     | ASP808 | -1     | LEU900 |        |        |        |
| PRO73 | LEU165 | ALA257        | GLU349 | -1     | ASN441 | ALA533 | LEU625 | LEU717 | GLY809 | HIE901 |        |        |        |        |
| SER74 | GLY166 | ARG258        | +1     | PRO350 | ARG442 | +1     | ALA534 | GLU626 | -1     | SER718 | THR810 | PRO902 |        |        |
| PRO75 | ALA167 | LEU259        | TYR351 | PHE443 | GLN535 | ASN627 | SER719 | MET811 | GLU903 | -1     |        |        |        |        |
| LYS76 | +1     | THR168        | ALA260 | ARG352 | +1     | TYR444 | ALA536 | VAL628 | GLY720 | ALA812 | GLN904 |        |        |        |
| LYN77 | SER169 | GLU261        | -1     | ILE353 | PHE445 | PHE537 | ARG629 | +1     | PRO721 | ARG813 | +1     | HIE905 |        |        |
| MET78 | ASP170 | -1            | MET262 | GLY354 | LEU446 | ARG538 | +1     | ASN630 | PHE722 | LYN814 | ARG906 | +1     |        |        |
| HIE79 | PRO171 | ARG263        | +1     | ARG355 | +1     | GLU447 | -1     | LEU539 | PHE631 | ARG723 | +1     | LEU815 | VAL907 |        |
| GLN80 | LEU172 | GLN264        | ILE356 | ALA448 | ASN540 | VAL632 | THR724 | ARG816 | +1     | VAL908 |        |        |        |        |
| GLY81 | GLU173 | -1            | LYS265 | +1     | LYS357 | +1     | TYR449 | ASN541 | SER633 | ILE725 | TYR817 | SER909 |        |        |
| LYS82 | +1     | LEU174        | GLU266 | -1     | GLU358 | -1     | ASN450 | PRO542 | PHE634 | THR726 | THR818 | VAL910 |        |        |
| LYS83 | +1     | PHE175        | ILE267 | ILE359 | ALA451 | GLY543 | LYN635 | VAL727 | HIE819 | ARG911 | +1     |        |        |        |
| LYN84 | LEU176 | PRO268        | PHE360 | LYS452 | +1     | SER544 | ARG636 | +1     | ARG728 | +1     | HIE820 | GLU912 | -1     |        |
| LYS85 | +1     | VAL177        | ARG269 | +1     | CYS361 | SER453 | THR545 | SER637 | ASP729 | -1     | ASP821 | -1     | CYS913 |        |
| GLN86 | ASP178 | -1            | VAL270 | PRO362 | LYS454 | +1     | VAL546 | MET638 | THR730 | ARG822 | +1     | ALA914 |        |        |
| ASN87 | GLH179 | LEU271        | LYN363 | SER455 | PHE547 | VAL639 | MET731 | LYS823 | +1     | ARG915 | +1     |        |        |        |
| LYS88 | +1     | <b>CY3180</b> | GLU272 | -1     | LYS364 | +1     | PHE456 | THR548 | LEU640 | SER732 | ASN824 | SER916 |        |        |
| ASN89 | GLU181 | -1            | GLN273 | SER365 | GLU457 | -1     | GLH549 | LYS641 | +1     | ASP733 | -1     | GLY825 | GLN917 |        |
| ARG90 | +1     | ASP182        | -1     | LEU274 | ASN366 | ASP458 | -1     | ASP550 | -1     | LEU642 | LEU734 | ARG826 | +1     | GLY918 |
| ILE91 | MET183 | GLU275        | -1     | GLY367 | PRO459 | CYS551 | THR643 | PRO735 | SER827 | PHE919 |        |        |        |        |
| SER92 | GLN184 | ASP276        | -1     | ARG368 | +1     | PRO460 | ASN552 | LEU644 | GLU736 | -1     | SER828 | PRO920 |        |        |
| TRP93 | LEU185 | LEU277        | PRO369 | ASN461 | ILE553 | ARG645 | +1     | VAL737 | SER829 | ASP921 | -1     |        |        |        |
| VAL94 | SER186 | ASP278        | -1     | ASN370 | HID462 | LEU554 | CYS646 | ARG738 | +1     | GLY830 | THR922 |        |        |        |
| GLY95 | TYR187 | SER279        | GLH371 | ALA463 | LEU555 | LEU647 | ASN739 | ALA831 | TYR923 |        |        |        |        |        |
| GLU96 | -1     | ILE188        | ARG280 | +1     | THR372 | ARG464 | +1     | LYS556 | +1     | VAL648 | GLY740 | LEU832 | ARG924 | +1     |

**Table S3.** Residue protonation states in CutC. The residue ASP216 is manually assigned as ASH216 from the experimental hypothesis that TMA could be protonated by that aspartic acid.

| Res   | q  | Res    | q  | Res    | q  | Res    | q  | Res    | q  | Res    | q  | Res    | q  |
|-------|----|--------|----|--------|----|--------|----|--------|----|--------|----|--------|----|
| GLY53 | 0  | VAL167 | 0  | GLU281 | -1 | PHE395 | 0  | TRP509 | 0  | LYS623 | 1  | GLY737 | 0  |
| ILE54 | 0  | LEU168 | 0  | LEU282 | 0  | VAL396 | 0  | PRO510 | 0  | LYS624 | 1  | PRO738 | 0  |
| PRO55 | 0  | ARG169 | 1  | ALA283 | 0  | ASN397 | 0  | ILE511 | 0  | LEU625 | 0  | THR739 | 0  |
| ASP56 | -1 | GLU170 | -1 | ALA284 | 0  | MET398 | 0  | CYS512 | 0  | VAL626 | 0  | ALA740 | 0  |
| GLY57 | 0  | GLU171 | -1 | ARG285 | 1  | CYS399 | 0  | ILE513 | 0  | TYR627 | 0  | ILE741 | 0  |
| PRO58 | 0  | VAL172 | 0  | GLU286 | -1 | VAL400 | 0  | GLU514 | -1 | ASP628 | -1 | ILE742 | 0  |
| THR59 | 0  | PHE173 | 0  | THR287 | 0  | GLY401 | 0  | LEU515 | 0  | ASP629 | -1 | LYS743 | 1  |
| PRO60 | 0  | PRO174 | 0  | ASP288 | -1 | GLY402 | 0  | VAL516 | 0  | ARG630 | 1  | SER744 | 0  |
| ARG61 | 1  | PHE175 | 0  | PRO289 | 0  | VAL403 | 0  | LEU517 | 0  | LYS631 | 1  | VAL745 | 0  |
| HIE62 | 0  | TRP176 | 0  | ARG290 | 1  | THR404 | 0  | ASN518 | 0  | TYR632 | 0  | SER746 | 0  |
| VAL63 | 0  | GLN177 | 0  | ARG291 | 1  | ARG405 | 1  | HID519 | 0  | THR633 | 0  | LYS747 | 1  |
| LYS64 | 1  | ASN178 | 0  | LYS292 | 1  | GLU406 | -1 | GLY520 | 0  | LEU634 | 0  | MET748 | 0  |
| LEU65 | 0  | LYS179 | 1  | ALA293 | 0  | GLY407 | 0  | VAL521 | 0  | ALA635 | 0  | ALA749 | 0  |
| LYS66 | 1  | SER180 | 0  | GLU294 | -1 | HID408 | 0  | PRO522 | 0  | GLN636 | 0  | ASN750 | 0  |
| GLU67 | -1 | VAL181 | 0  | LEU295 | 0  | ASP409 | -1 | LEU523 | 0  | LEU637 | 0  | ASP751 | -1 |
| ASN68 | 0  | ASP182 | -1 | GLN296 | 0  | ALA410 | 0  | TRP524 | 0  | ASN638 | 0  | ASN752 | 0  |
| PHE69 | 0  | GLU183 | -1 | LYS297 | 1  | THR411 | 0  | TYR525 | 0  | GLU639 | -1 | MET753 | 0  |
| LEU70 | 0  | PHE184 | 0  | ILE298 | 0  | ASN412 | 0  | GLY526 | 0  | ALA640 | 0  | ASN754 | 0  |
| LYS71 | 1  | CYS185 | 0  | SER299 | 0  | ASP413 | -1 | ALA527 | 0  | LEU641 | 0  | ILE755 | 0  |
| GLN72 | 0  | GLU186 | -1 | GLU300 | -1 | LEU414 | 0  | LYS528 | 1  | LYS642 | 1  | GLY756 | 0  |
| VAL73 | 0  | GLY187 | 0  | VAL301 | 0  | THR415 | 0  | VAL529 | 0  | ALA643 | 0  | MET757 | 0  |

| Res    | q  | Res           | q  | Res    | q  | Res    | q  | Res    | q  | Res    | q  | Res    | q  |
|--------|----|---------------|----|--------|----|--------|----|--------|----|--------|----|--------|----|
| PRO74  | 0  | GLN188        | 0  | ASN302 | 0  | TYR416 | 0  | THR530 | 0  | ASP644 | -1 | VAL758 | 0  |
| SER75  | 0  | TYR189        | 0  | ALA303 | 0  | MET417 | 0  | PRO531 | 0  | PHE645 | 0  | HIE759 | 0  |
| ILE76  | 0  | ARG190        | 1  | ARG304 | 1  | LEU418 | 0  | ASP532 | -1 | ALA646 | 0  | ASN760 | 0  |
| THR77  | 0  | GLU191        | -1 | VAL305 | 0  | MET419 | 0  | MET533 | 0  | GLY647 | 0  | PHE761 | 0  |
| VAL78  | 0  | ALA192        | 0  | PRO306 | 0  | ASP420 | -1 | GLY534 | 0  | TYR648 | 0  | LYS762 | 1  |
| GLN79  | 0  | ASP193        | -1 | ALA307 | 0  | ALA421 | 0  | ASP535 | -1 | ASP649 | -1 | LEU763 | 0  |
| ARG80  | 1  | LEU194        | 0  | HIE308 | 0  | VAL422 | 0  | LEU536 | 0  | GLN650 | 0  | MET764 | 0  |
| ALA81  | 0  | TRP195        | 0  | ALA309 | 0  | ARG423 | 1  | SER537 | 0  | ILE651 | 0  | SER765 | 0  |
| VAL82  | 0  | GLU196        | -1 | PRO310 | 0  | HID424 | 0  | GLN538 | 0  | LEU652 | 0  | GLY766 | 0  |
| ALA83  | 0  | MET197        | 0  | SER311 | 0  | VAL425 | 0  | TYR539 | 0  | ALA653 | 0  | LEU767 | 0  |
| ILE84  | 0  | SER198        | 0  | ASN312 | 0  | ARG426 | 1  | ASP540 | -1 | ASP654 | -1 | LEU768 | 0  |
| THR85  | 0  | GLY199        | 0  | PHE313 | 0  | ILE427 | 0  | THR541 | 0  | CYS655 | 0  | ASP769 | -1 |
| LYS86  | 1  | GLU200        | -1 | TRP314 | 0  | TYR428 | 0  | TYR542 | 0  | LEU656 | 0  | THR770 | 0  |
| ILE87  | 0  | SER201        | 0  | GLU315 | -1 | GLN429 | 0  | GLU543 | -1 | ALA657 | 0  | PRO771 | 0  |
| ALA88  | 0  | PHE202        | 0  | ALA316 | 0  | PRO430 | 0  | LYS544 | 1  | ALA658 | 0  | GLU772 | -1 |
| LYS89  | 1  | VAL203        | 0  | ILE317 | 0  | THR431 | 0  | PHE545 | 0  | PRO659 | 0  | GLY773 | 0  |
| GLU90  | -1 | SER204        | 0  | GLN318 | 0  | LEU432 | 0  | GLU546 | -1 | LYS660 | 1  | GLU774 | -1 |
| ASN91  | 0  | ASP205        | -1 | ALA319 | 0  | ALA433 | 0  | ALA547 | 0  | TYR661 | 0  | ASN775 | 0  |
| PRO92  | 0  | CYS206        | 0  | VAL320 | 0  | THR434 | 0  | ALA548 | 0  | GLY662 | 0  | GLY776 | 0  |
| GLY93  | 0  | SER207        | 0  | TRP321 | 0  | ARG435 | 1  | VAL549 | 0  | ASN663 | 0  | LEU777 | 0  |
| LEU94  | 0  | TYR208        | 0  | THR322 | 0  | VAL436 | 0  | LYS550 | 1  | ASP664 | -1 | ILE778 | 0  |
| PRO95  | 0  | HIP209        | 0  | VAL323 | 0  | HIE437 | 0  | GLU551 | -1 | ASP665 | -1 | THR779 | 0  |
| LYS96  | 1  | ALA210        | 0  | GLU324 | -1 | ASN438 | 0  | GLN552 | 0  | ASP666 | -1 | LEU780 | 0  |
| PRO97  | 0  | VAL211        | 0  | SER325 | 0  | LYS439 | 1  | ILE553 | 0  | TYR667 | 0  | ILE781 | 0  |
| LEU98  | 0  | ASN212        | 0  | LEU326 | 0  | SER440 | 0  | ARG554 | 1  | ALA668 | 0  | ARG782 | 1  |
| LEU99  | 0  | GLY213        | 0  | LEU327 | 0  | PRO441 | 0  | TRP555 | 0  | ASP669 | -1 | THR783 | 0  |
| ARG100 | 1  | GLY214        | 0  | VAL328 | 0  | GLN442 | 0  | ILE556 | 0  | MET670 | 0  | ALA784 | 0  |
| ALA101 | 0  | GLY215        | 0  | VAL329 | 0  | LYS443 | 1  | THR557 | 0  | ILE671 | 0  | CYS785 | 0  |
| LYS102 | 1  | <b>ASH216</b> | 0  | GLU330 | -1 | TYR444 | 0  | LYS558 | 1  | ALA672 | 0  | MET786 | 0  |
| THR103 | 0  | SER217        | 0  | GLU331 | -1 | LEU445 | 0  | ASN559 | 0  | ALA673 | 0  | LEU787 | 0  |
| PHE104 | 0  | ASN218        | 0  | ASN332 | 0  | LYS446 | 1  | THR560 | 0  | ASP674 | -1 | GLY788 | 0  |
| ARG105 | 1  | PRO219        | 0  | GLN333 | 0  | LYS447 | 1  | SER561 | 0  | LEU675 | 0  | ASN789 | 0  |
| TYR106 | 0  | GLY220        | 0  | THR334 | 0  | ILE448 | 0  | VAL562 | 0  | VAL676 | 0  | GLY790 | 0  |
| CYS107 | 0  | TYR221        | 0  | GLY335 | 0  | VAL449 | 0  | ALA563 | 0  | HIE677 | 0  | GLU791 | -1 |
| CYS108 | 0  | ASP222        | -1 | MET336 | 0  | ASP450 | -1 | THR564 | 0  | PHE678 | 0  | MET792 | 0  |
| GLU109 | -1 | VAL223        | 0  | SER337 | 0  | VAL451 | 0  | VAL565 | 0  | THR679 | 0  | GLN793 | 0  |
| THR110 | 0  | ILE224        | 0  | ILE338 | 0  | ILE452 | 0  | ILE566 | 0  | GLU680 | -1 | PHE794 | 0  |
| ALA111 | 0  | LEU225        | 0  | GLY339 | 0  | ARG453 | 1  | SER567 | 0  | THR681 | 0  | ASN795 | 0  |
| PRO112 | 0  | MET226        | 0  | ARG340 | 1  | SER454 | 0  | GLN568 | 0  | GLU682 | -1 | TYR796 | 0  |
| LEU113 | 0  | LYS227        | 1  | VAL341 | 0  | GLY455 | 0  | ARG569 | 1  | HID683 | 0  | LEU797 | 0  |
| VAL114 | 0  | LYS228        | 1  | ASP342 | -1 | MET456 | 0  | ALA570 | 0  | ARG684 | 1  | ASP798 | -1 |
| ILE115 | 0  | GLY229        | 0  | GLN343 | 0  | GLY457 | 0  | HIE571 | 0  | LYS685 | 1  | ASN799 | 0  |
| GLN116 | 0  | MET230        | 0  | TYR344 | 0  | PHE458 | 0  | ARG572 | 1  | TYR686 | 0  | GLU800 | -1 |
| ASP117 | -1 | LEU231        | 0  | MET345 | 0  | PRO459 | 0  | GLU573 | -1 | LYS687 | 1  | LEU801 | 0  |
| HIE118 | 0  | ASP232        | -1 | TYR346 | 0  | ALA460 | 0  | LEU574 | 0  | THR688 | 0  | LEU802 | 0  |
| GLU119 | -1 | ILE233        | 0  | PRO347 | 0  | VAL461 | 0  | ALA575 | 0  | LEU689 | 0  | LEU803 | 0  |
| LEU120 | 0  | GLN234        | 0  | PHE348 | 0  | HID462 | 0  | PRO576 | 0  | TYR690 | 0  | ASP804 | -1 |

|        |    |        |    |        |    |        |    |        |    |        |    |               |          |
|--------|----|--------|----|--------|----|--------|----|--------|----|--------|----|---------------|----------|
| Res    | q  |               |          |
| ILE121 | 0  | ARG235 | 1  | TYR349 | 0  | PHE463 | 0  | LYS577 | 1  | SER691 | 0  | ALA805        | 0        |
| VAL122 | 0  | GLU236 | -1 | ARG350 | 1  | ASP464 | -1 | PRO578 | 0  | VAL692 | 0  | GLN806        | 0        |
| GLY123 | 0  | ALA237 | 0  | ALA351 | 0  | ASP465 | -1 | LEU579 | 0  | LEU693 | 0  | LYS807        | 1        |
| SER124 | 0  | ARG238 | 1  | ASP352 | -1 | ALA466 | 0  | MET580 | 0  | SER694 | 0  | HIE808        | 0        |
| PRO125 | 0  | GLU239 | -1 | ILE353 | 0  | HID467 | 0  | SER581 | 0  | HID695 | 0  | PRO809        | 0        |
| ASN126 | 0  | LYS240 | 1  | ASP354 | -1 | ILE468 | 0  | LEU582 | 0  | GLY696 | 0  | GLU810        | -1       |
| GLY127 | 0  | LEU241 | 0  | SER355 | 0  | LYS469 | 1  | MET583 | 0  | THR697 | 0  | LYS811        | 1        |
| ALA128 | 0  | GLU242 | -1 | GLY356 | 0  | MET470 | 0  | TYR584 | 0  | LEU698 | 0  | TYR812        | 0        |
| PRO129 | 0  | GLN243 | 0  | ARG357 | 1  | MET471 | 0  | GLU585 | -1 | SER699 | 0  | ARG813        | 1        |
| ARG130 | 1  | LEU244 | 0  | LEU358 | 0  | LEU472 | 0  | GLY586 | 0  | ILE700 | 0  | ASP814        | -1       |
| ALA131 | 0  | ASP245 | -1 | THR359 | 0  | ALA473 | 0  | CYS587 | 0  | SER701 | 0  | LEU815        | 0        |
| GLY132 | 0  | TYR246 | 0  | GLU360 | -1 | LYS474 | 1  | MET588 | 0  | ASN702 | 0  | VAL816        | 0        |
| ALA133 | 0  | ALA247 | 0  | TYR361 | 0  | GLY475 | 0  | GLU589 | -1 | ASN703 | 0  | VAL817        | 0        |
| PHE134 | 0  | ASN248 | 0  | GLU362 | -1 | VAL476 | 0  | SER590 | 0  | THR704 | 0  | ARG818        | 1        |
| SER135 | 0  | PRO249 | 0  | ALA363 | 0  | SER477 | 0  | GLY591 | 0  | PRO705 | 0  | VAL819        | 0        |
| PRO136 | 0  | GLU250 | -1 | PHE364 | 0  | ILE478 | 0  | ARG592 | 1  | PHE706 | 0  | ALA820        | 0        |
| GLU137 | -1 | ASP251 | -1 | ASP365 | -1 | GLU479 | -1 | ASP593 | -1 | GLY707 | 0  | GLY821        | 0        |
| VAL138 | 0  | ILE252 | 0  | LEU366 | 0  | ASP480 | -1 | VAL594 | 0  | GLN708 | 0  | TYR822        | 0        |
| ALA139 | 0  | ASP253 | -1 | ALA367 | 0  | ALA481 | 0  | SER595 | 0  | LEU709 | 0  | SER823        | 0        |
| TRP140 | 0  | LYS254 | 1  | GLY368 | 0  | ARG482 | 1  | ALA596 | 0  | LEU710 | 0  | ALA824        | 0        |
| ARG141 | 1  | ILE255 | 0  | CYS369 | 0  | ASP483 | -1 | GLY597 | 0  | GLY711 | 0  | PHE825        | 0        |
| TRP142 | 0  | TYR256 | 0  | MET370 | 0  | TYR484 | 0  | GLY598 | 0  | ALA712 | 0  | PHE826        | 0        |
| LEU143 | 0  | PHE257 | 0  | LEU371 | 0  | CYS485 | 0  | ALA599 | 0  | SER713 | 0  | VAL827        | 0        |
| GLN144 | 0  | TYR258 | 0  | VAL372 | 0  | LEU486 | 0  | MET600 | 0  | ALA714 | 0  | GLU828        | -1       |
| ASP145 | -1 | LYS259 | 1  | LYS373 | 1  | MET487 | 0  | TYR601 | 0  | ASN715 | 0  | LEU829        | 0        |
| GLU146 | -1 | SER260 | 0  | MET374 | 0  | GLY488 | 0  | ASN602 | 0  | GLY716 | 0  | CYS830        | 0        |
| LEU147 | 0  | VAL261 | 0  | SER375 | 0  | CYS489 | 0  | PHE603 | 0  | ARG717 | 1  | LYS831        | 1        |
| ASP148 | -1 | ILE262 | 0  | GLU376 | -1 | VAL490 | 0  | GLY604 | 0  | ARG718 | 1  | ASP832        | -1       |
| THR149 | 0  | GLU263 | -1 | MET377 | 0  | GLU491 | -1 | PRO605 | 0  | ALA719 | 0  | VAL833        | 0        |
| ILE150 | 0  | THR264 | 0  | MET378 | 0  | PRO492 | 0  | GLY606 | 0  | TRP720 | 0  | GLN834        | 0        |
| GLY151 | 0  | ALA265 | 0  | TRP379 | 0  | GLN493 | 0  | VAL607 | 0  | MET721 | 0  | ASP835        | -1       |
| SER152 | 0  | GLU266 | -1 | ILE380 | 0  | LYS494 | 1  | VAL608 | 0  | PRO722 | 0  | GLU836        | -1       |
| ARG153 | 1  | GLY267 | 0  | THR381 | 0  | SER495 | 0  | TRP609 | 0  | LEU723 | 0  | ILE837        | 0        |
| PRO154 | 0  | VAL268 | 0  | SER382 | 0  | GLY496 | 0  | SER610 | 0  | SER724 | 0  | ILE838        | 0        |
| GLN155 | 0  | MET269 | 0  | GLU383 | -1 | ARG497 | 1  | GLY611 | 0  | ASP725 | -1 | SER839        | 0        |
| ASP156 | -1 | ILE270 | 0  | GLY384 | 0  | LEU498 | 0  | LEU612 | 0  | GLY726 | 0  | ARG840        | 1        |
| PRO157 | 0  | TYR271 | 0  | ALA385 | 0  | TYR499 | 0  | ALA613 | 0  | ILE727 | 0  | THR841        | 0        |
| PHE158 | 0  | ALA272 | 0  | SER386 | 0  | GLN500 | 0  | THR614 | 0  | SER728 | 0  | MET842        | 0        |
| TYR159 | 0  | ARG273 | 1  | LYS387 | 1  | TRP501 | 0  | TYR615 | 0  | PRO729 | 0  | LEU843        | 0        |
| ILE160 | 0  | ARG274 | 1  | PHE388 | 0  | THR502 | 0  | VAL616 | 0  | THR730 | 0  | HIE844        | 0        |
| SER161 | 0  | LEU275 | 0  | PHE389 | 0  | SER503 | 0  | ASP617 | -1 | GLN731 | 0  | GLY845        | 0        |
| GLU162 | -1 | SER276 | 0  | ALA390 | 0  | THR504 | 0  | SER618 | 0  | GLY732 | 0  | PHE846        | 0        |
| GLU163 | -1 | ALA277 | 0  | GLY391 | 0  | GLY505 | 0  | MET619 | 0  | ALA733 | 0  | <b>CHT847</b> | <b>1</b> |
| ASP164 | -1 | TYR278 | 0  | TYR392 | 0  | TYR506 | 0  | ALA620 | 0  | ASP734 | -1 |               |          |
| LYS165 | 1  | ALA279 | 0  | GLN393 | 0  | THR507 | 0  | ALA621 | 0  | TYR735 | 0  |               |          |
| LYS166 | 1  | ALA280 | 0  | PRO394 | 0  | GLN508 | 0  | ILE622 | 0  | LYS736 | 1  |               |          |

**Table S4.** Overall charge assignment to DNMT structure.

| Component            | Charge     |
|----------------------|------------|
| Positive amino acids | +126       |
| Negative amino acids | -121       |
| DNA                  | -21        |
| Zn1 site             | -1         |
| Zn2 site             | -2         |
| Zn3 site             | -1         |
| Zn4 site             | -2         |
| <b>Total</b>         | <b>-22</b> |

**Table S5.** Overall charge assignment to CutC structure.

| Component            | Charge     |
|----------------------|------------|
| Positive amino acids | +84        |
| Negative amino acids | -104       |
| Choline              | +1         |
| <b>Total</b>         | <b>-19</b> |

**Table S6.** Charges assigned to Zn<sup>2+</sup> sites according to Zinc Amber Force Field.

| Sites 1 (and 3) |                |              |
|-----------------|----------------|--------------|
| Residue         | Residue number | Charge       |
| Zn1 (Zn3)       | 1 (3)          | 0.84         |
| HID             | 862 (153)      | 0.14         |
| CYS             | 838 (180)      | -0.66        |
| CYS             | 845 (256)      | -0.66        |
| CYS             | 836 (253)      | -0.66        |
|                 | <b>Total</b>   | <b>-1.00</b> |
| Sites 2 (and 4) |                |              |
| Zn2 (Zn4)       | 2 (4)          | 0.52         |
| CYS             | 13 (46)        | -0.63        |
| CYS             | 16 (30)        | -0.63        |
| CYS             | 19 (24)        | -0.63        |
| CYS             | 51 (27)        | -0.63        |
|                 | <b>Total</b>   | <b>-2.0</b>  |

**Table S7.** QM residues included in CSA region and selected after with # atoms and charge.

| Res. # | Res.       | # At | Charge | CSA?   |       | Large QM |
|--------|------------|------|--------|--------|-------|----------|
|        |            |      |        | Before | After |          |
| 208    | TYR        | 21   | 0      | Y      | Y     | Y        |
| 209    | HIP        | 18   | 1      | Y      | --    | Y        |
| 212    | ASN        | 14   | 0      | Y      | --    | Y        |
| 213    | GLY        | 7    | 0      | Y      | --    | Y        |
| 214    | GLY        | 7    | 0      | Y      | --    | Y        |
| 215    | GLY        | 7    | 0      | Y      | --    | Y        |
| 216    | ASH        | 13   | 0      | Y      | Y     | Y        |
| 217    | SER        | 11   | 0      | Y      | --    | Y        |
| 218    | ASN        | 14   | 0      | Y      | --    | Y        |
| 219    | <i>PRO</i> | 14   | 0      | --     | --    | Y        |
| 327    | <i>LEU</i> | 19   | 0      | --     | --    | Y        |
| 332    | <i>ASN</i> | 14   | 0      | --     | --    | Y        |
| 333    | GLN        | 17   | 0      | Y      | Y     | Y        |
| 334    | THR        | 14   | 0      | Y      | --    | Y        |
| 335    | GLY        | 7    | 0      | Y      | --    | Y        |
| 336    | MET        | 17   | 0      | Y      | Y     | Y        |
| 337    | SER        | 11   | 0      | Y      | --    | Y        |
| 379    | TRP        | 24   | 0      | Y      | --    | Y        |
| 381    | THR        | 14   | 0      | Y      | --    | Y        |
| 385    | ALA        | 10   | 0      | Y      | --    | Y        |
| 388    | PHE        | 20   | 0      | Y      | --    | Y        |
| 389    | PHE        | 20   | 0      | Y      | Y     | Y        |
| 390    | <i>ALA</i> | 10   | 0      | --     | --    | Y        |
| 393    | GLN        | 17   | 0      | Y      | Y     | Y        |
| 394    | PRO        | 14   | 0      | Y      | --    | Y        |
| 395    | PHE        | 20   | 0      | Y      | --    | Y        |
| 396    | VAL        | 16   | 0      | Y      | --    | Y        |
| 397    | ASN        | 14   | 0      | Y      | --    | Y        |
| 429    | GLN        | 17   | 0      | Y      | --    | Y        |
| 431    | THR        | 14   | 0      | Y      | --    | Y        |
| 462    | <i>HID</i> | 17   | 0      | --     | --    | Y        |
| 486    | LEU        | 19   | 0      | Y      | --    | Y        |
| 487    | MET        | 17   | 0      | Y      | --    | Y        |
| 488    | GLY        | 7    | 0      | Y      | Y     | Y        |
| 489    | CYS        | 11   | 0      | Y      | Y     | Y        |
| 490    | VAL        | 16   | 0      | Y      | Y     | Y        |
| 491    | GLU        | 15   | -1     | Y      | Y     | Y        |
| 492    | PRO        | 14   | 0      | Y      | --    | Y        |
| 493    | GLN        | 17   | 0      | Y      | --    | Y        |
| 499    | <i>TYR</i> | 21   | 0      | --     | --    | Y        |
| 500    | GLN        | 17   | 0      | Y      | --    | Y        |
| 501    | TRP        | 24   | 0      | Y      | Y     | Y        |
| 502    | THR        | 14   | 0      | Y      | --    | Y        |
| 503    | SER        | 11   | 0      | Y      | --    | Y        |
| 504    | THR        | 14   | 0      | Y      | --    | Y        |
| 505    | GLY        | 7    | 0      | Y      | --    | Y        |
| 506    | TYR        | 21   | 0      | Y      | --    | Y        |
| 580    | MET        | 17   | 0      | Y      | --    | Y        |



| Res. #        | Res. | # At | Charge    | CSA? |     | Large QM |
|---------------|------|------|-----------|------|-----|----------|
| 605           | PRO  | 14   | 0         | Y    | --  | Y        |
| 606           | GLY  | 7    | 0         | Y    | --  | Y        |
| 607           | VAL  | 16   | 0         | --   | --  | Y        |
| 608           | VAL  | 16   | 0         | Y    | --  | Y        |
| 696           | GLY  | 7    | 0         | Y    | --  | Y        |
| 697           | THR  | 14   | 0         | Y    | --  | Y        |
| 698           | LEU  | 19   | 0         | Y    | --  | Y        |
| 699           | SER  | 11   | 0         | Y    | --  | Y        |
| 700           | ILE  | 19   | 0         | Y    | --  | Y        |
| 701           | SER  | 11   | 0         | Y    | --  | Y        |
| 702           | ASN  | 14   | 0         | Y    | --  | Y        |
| 755           | ILE  | 19   | 0         | Y    | --  | Y        |
| 756           | GLY  | 7    | 0         | Y    | --  | Y        |
| 757           | MET  | 17   | 0         | Y    | --  | Y        |
| 758           | VAL  | 16   | 0         | Y    | --  | Y        |
| 818           | ARG  | 24   | 1         | --   | --  | Y        |
| 819           | VAL  | 16   | 0         | Y    | Y   | --       |
| 820           | ALA  | 10   | 0         | Y    | Y   | Y        |
| 821           | GLY  | 7    | 0         | Y    | Y   | Y        |
| 822           | TYR  | 21   | 0         | Y    | Y   | Y        |
| 823           | SER  | 11   | 0         | Y    | Y   | --       |
| 847           | CHT  | 21   | 1         | Y    | Y   | Y        |
| 872           | WAT  | 3    | 0         | Y    | --  | --       |
| 874           | WAT  | 3    | 0         | Y    | --  | --       |
| 875           | WAT  | 3    | 0         | Y    | --  | --       |
| 879           | WAT  | 3    | 0         | Y    | --  | --       |
| 882           | WAT  | 3    | 0         | Y    | --  | --       |
| 883           | WAT  | 3    | 0         | Y    | --  | --       |
| 886           | WAT  | 3    | 0         | Y    | --  | --       |
| 891           | WAT  | 3    | 0         | Y    | --  | --       |
| 894           | WAT  | 3    | 0         | Y    | --  | --       |
| 898           | WAT  | 3    | 0         | Y    | --  | --       |
| 902           | WAT  | 3    | 0         | Y    | --  | --       |
| 908           | WAT  | 3    | 0         | Y    | --  | --       |
| 965           | WAT  | 3    | 0         | Y    | --  | --       |
| 976           | WAT  | 3    | 0         | Y    | --  | --       |
| 977           | WAT  | 3    | 0         | Y    | --  | --       |
| 1052          | WAT  | 3    | 0         | Y    | --  | --       |
| 1524          | WAT  | 3    | 0         | Y    | --  | --       |
| 5044          | WAT  | 3    | 0         | Y    | --  | --       |
| 7696          | WAT  | 3    | 0         | Y    | --  | --       |
| <b>Totals</b> |      |      | # atoms   | 926  | 263 | 1003     |
|               |      |      | with link | 962  | 281 | 1043     |
|               |      |      | charge    | 1    | 0   | 2        |

**Table S8.** Comparison of isolated choline, hemiaminal intermediate, acetaldehyde and TMA (closed shell) species along with radicals (choline, choline O-centered radical, hemiaminal radical, hemiaminal O-centered radical, acetaldehyde radical) in the gas phase (GP), with a dielectric of 4 to represent the protein environment implicitly, and with thermodynamic T = 300 K corrections. All properties are evaluated at the  $\omega$ PBEh/6-311++G\*\* level of theory and reveal that although the hemiaminal intermediate is more stable than choline, its radical is much less stable.

| Species                            | GP   | $\epsilon=4$ | $+\Delta G_{\text{gas}}$ |
|------------------------------------|------|--------------|--------------------------|
| choline                            | 3.5  | 4.8          | <b>5.6</b>               |
| Hemiaminal int (enant/orig)        | 0    | 0            | <b>0</b>                 |
| acetaldehyde and trimethylammonium | 14.7 | 7.6          | <b>5.0</b>               |

| Species                                    | GP   | $\epsilon=4$ | $+\Delta G_{\text{gas}}$ |
|--------------------------------------------|------|--------------|--------------------------|
| choline radical                            | 0    | 0            | <b>0</b>                 |
| choline O radical                          | 18.0 | 15.5         | <b>14.5</b>              |
| Hemiaminal radical (enant/orig)            | 8.3  | 7.7          | <b>6.4</b>               |
| Hemiaminal O radical                       | 12.0 | 11.0         | <b>10.7</b>              |
| acetaldehyde radical and trimethylammonium | 15.2 | 7.0          | <b>6.0</b>               |

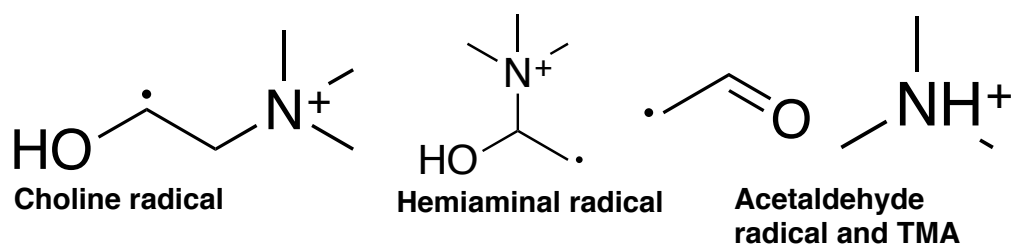

**Figure S1.** Structures of the hemiaminal intermediate and radical as well as choline and dissociated products.

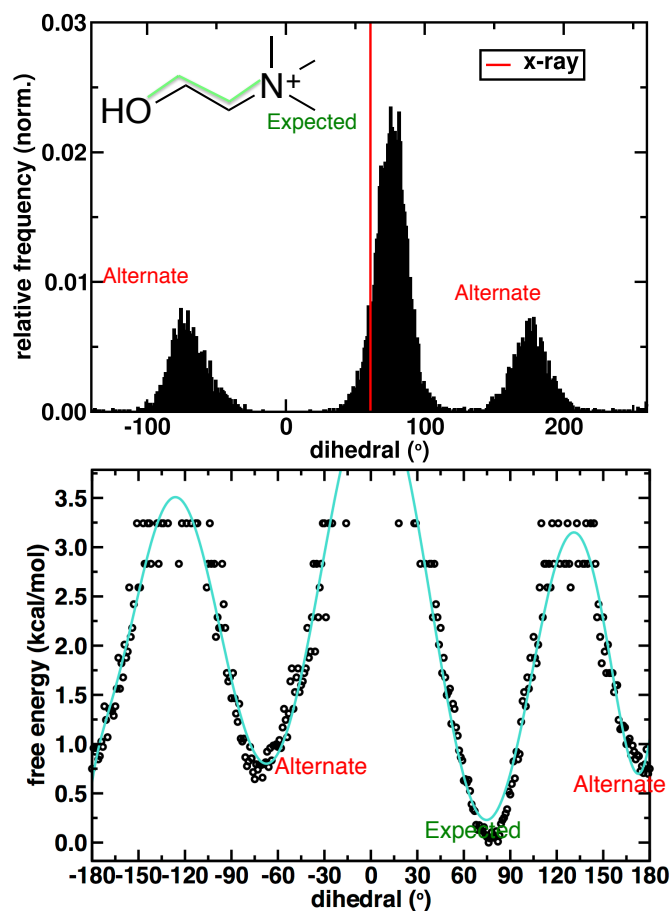

**Figure S2.** Choline dihedral sampled during 100 ns of NpT MD: top is relative frequency and bottom is estimated free energy via  $-kT\ln\langle P \rangle$ . The dihedral is shown in inset.

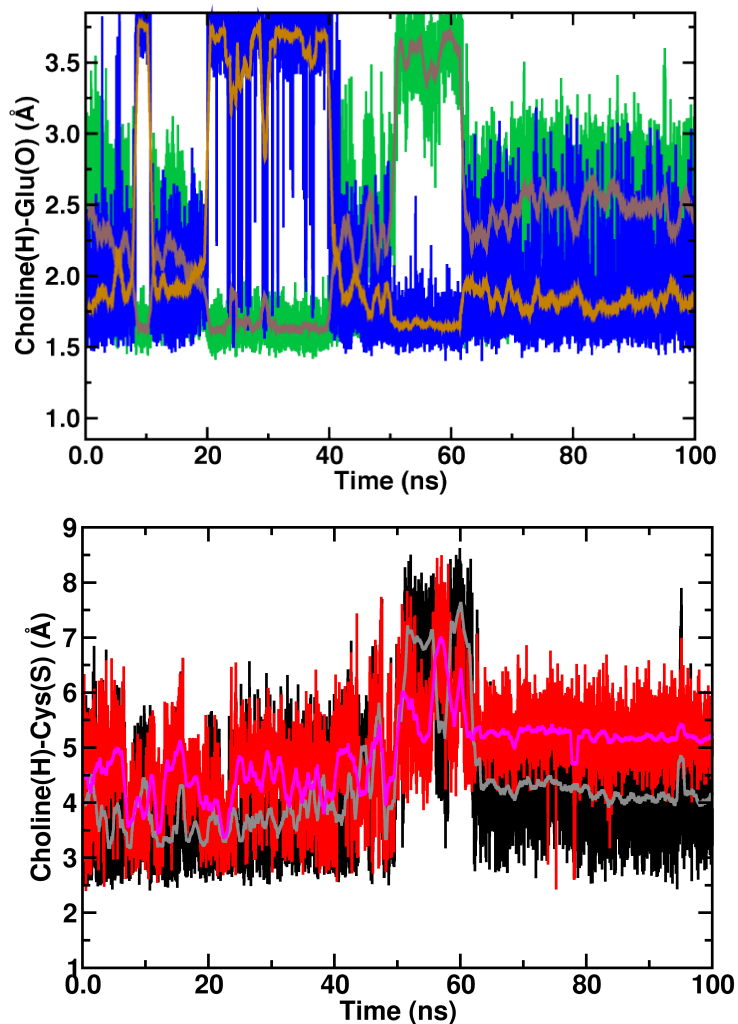

**Figure S3.** Distances sampled during 100 ns of NpT MD: top is Glu O<sup>-</sup> to choline hydroxyl H distance with a running average also shown (green and blue represent the two different O<sup>-</sup> atoms of Glu) and bottom is the distance of the choline H to be abstracted to the abstracting Cys S (Cys is not in radical form during dynamics, as the protein is in the resting state).

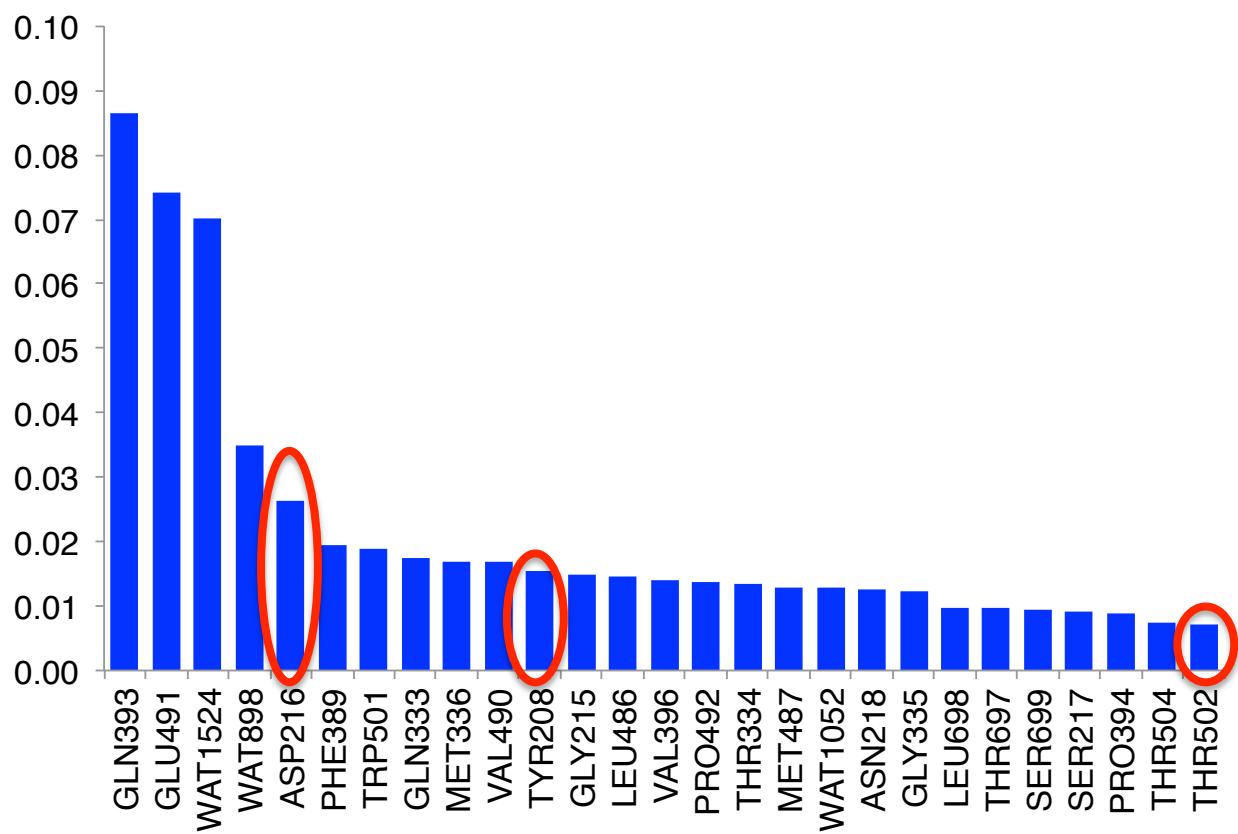

**Figure S4.** Ranked charge shifts from 962 atom QM region in CSA. Selected residues were identified as essential from experiment and marked with red circles.

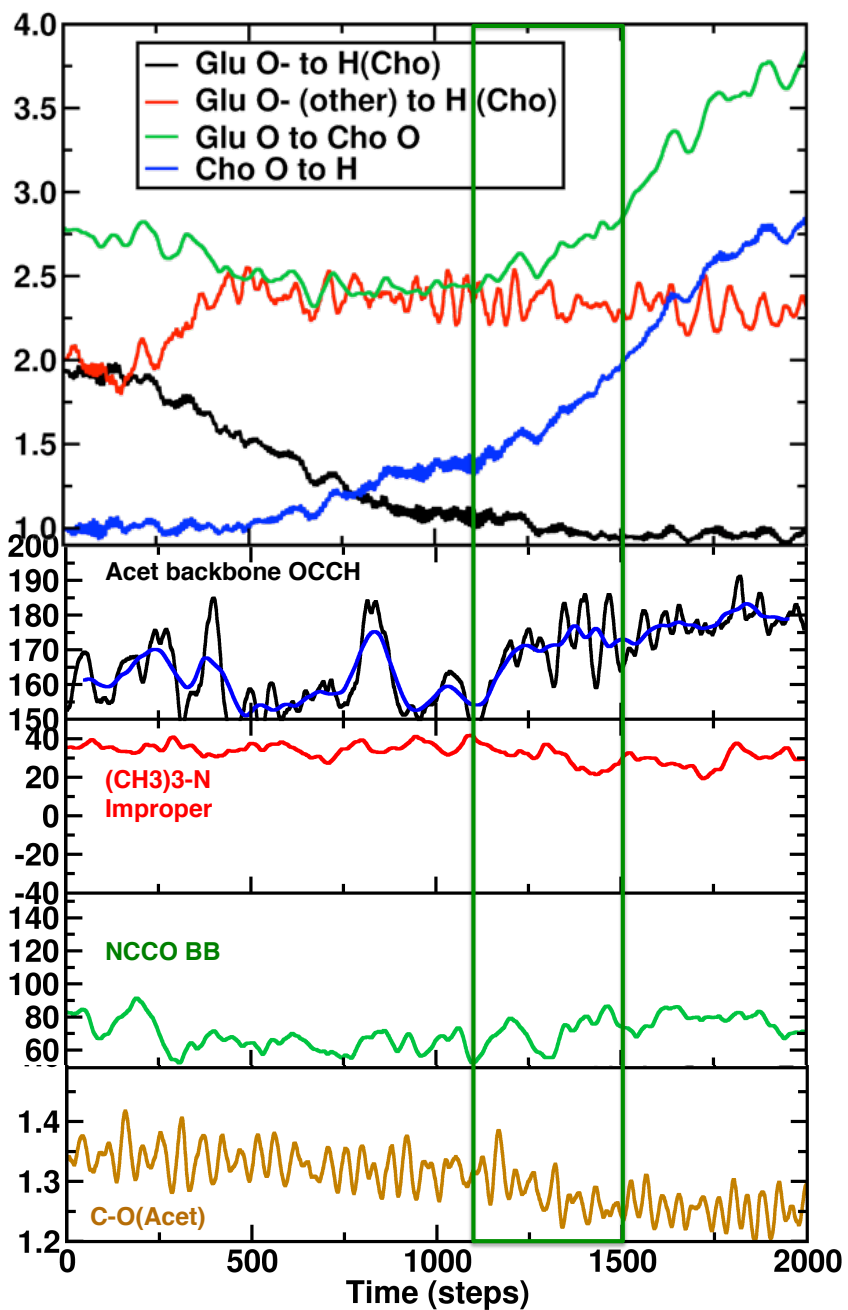

Figure S5. Additional geometric characteristics of the forced Cholinyl radical deprotonation.

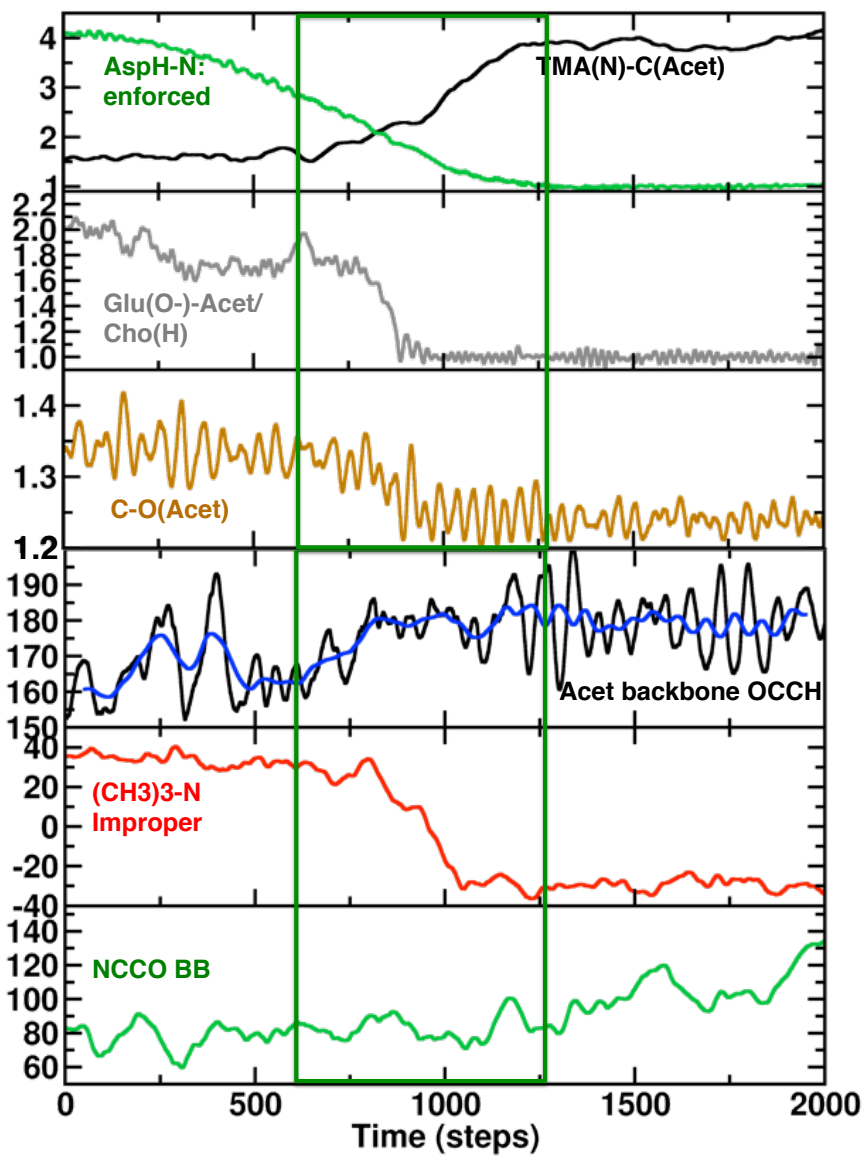

Figure S6. Forced TMA protonation geometric properties for SMD.

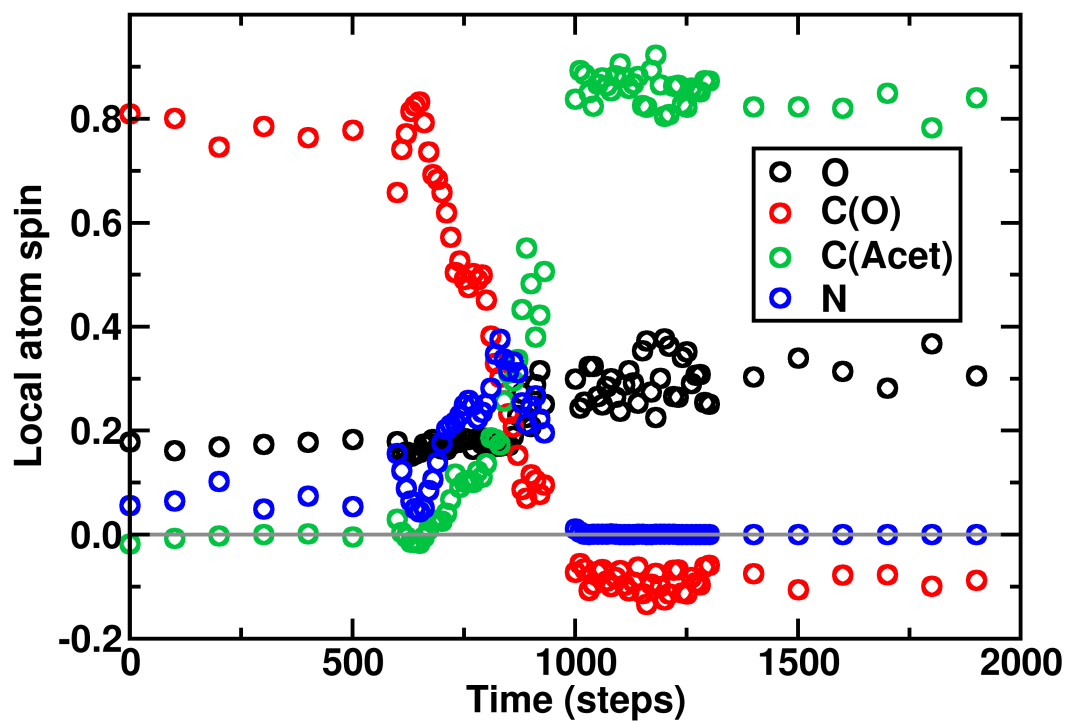

Figure S7. Spins during forced Choline radical protonation.

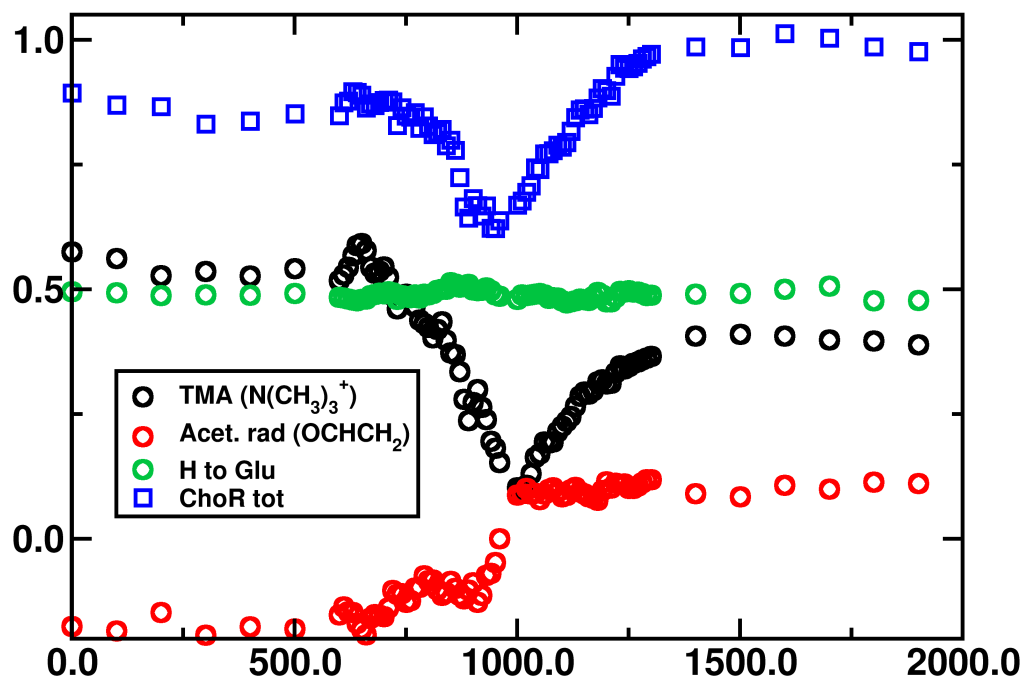

Figure S8. Charges of choline fragments during forced protonation.



**Table S9.** Summary of close contacts and C-H $\cdots$ O interactions in the CutC crystal structure.

| Res 1 (atom) | Res 2 (atom) | Distance (Å) | Total interaction energies (kcal/mol) |        |        | QTAIM<br>E <sub>HB</sub><br>(kcal/mol) |
|--------------|--------------|--------------|---------------------------------------|--------|--------|----------------------------------------|
|              |              |              | B3LYP                                 | SAPT0  | MM     |                                        |
| GLU279(OE1)  | ARG48(NH2)   | 2.6          | -38.4                                 | -97.6  | -88.3  | -18.8                                  |
| GLU776(OE2)  | ARG78(NH2)   | 2.4          | -42.0                                 | -109.2 | -80.0  | -33.0                                  |
| TYR340(OH)   | PRO105(O)    | 2.6          | -11.5                                 | -9.0   | -8.2   | -14.2                                  |
| LYS113(NZ)   | GLU110(OE2)  | 2.6          | -56.0                                 | -130.9 | -113.2 | -21.3                                  |
| MET536(O)    | TYR206(OH)   | 2.6          | -7.1                                  | -6.4   | -8.7   | -16.3                                  |
| TYR549(OH)   | ASP428(OD2)  | 2.6          | -20.4                                 | -26.0  | -17.9  | -17.5                                  |
| THR450(OG1)  | GLU439(OE2)  | 2.6          | -18.9                                 | -23.7  | -19.2  | -18.5                                  |
| ARG502(NH1)  | GLU499(OE2)  | 2.5          | -45.5                                 | -111.0 | -87.4  | -33.7                                  |
| THR636(OG1)  | GLY552(O)    | 2.5          | -3.8                                  | -2.5   | -4.6   | -14.4                                  |
| TYR615(OH)   | ASP576(OD2)  | 2.4          | -16.5                                 | -24.1  | -16.2  | -27.0                                  |
| ASP602(OD2)  | TYR580(OH)   | 2.6          | -17.6                                 | -23.0  | -15.5  | -16.4                                  |
| THR629(OG1)  | PHE626(O)    | 2.5          | -5.1                                  | -2.5   | -4.4   | -10.9                                  |
| GLN741(NE2)  | GLU739(OE2)  | 2.5          | -18.7                                 | -31.2  | -22.0  | -21.9                                  |
| TYR760(OH)   | ASP752(OD2)  | 2.5          | -23.7                                 | -31.3  | -21.5  | -19.9                                  |
| SER787(OG)   | GLU784(O)    | 2.5          | -10.0                                 | -12.7  | -15.3  | -17.6                                  |
| CHT795(C7)   | ASH164(OD1)  | 3.2          | -5.9                                  | -6.7   | -3.2   | -4.0                                   |
| CHT795(C6)   | TYR156(OH)   | 3.4          | -5.7                                  | -7.1   | -4.6   | -3.6                                   |
| CHT795(C7)   | THR450(OG1)  | 3.7          | -3.3                                  | -2.9   | -1.7   | -0.7                                   |

**Text S1.** Additional details about close contact analysis of CutC.

The interaction energies of the 15 close contact pairs in the CutC crystal structure range from -2.5 kcal/mol to -130.9 kcal/mol for SAPT0, from -3.8 kcal/mol to -56.0 kcal/mol for B3LYP, and from -4.4 kcal/mol to -113.2 kcal/mol for AMBER. The B3LYP energy range is much narrower than the SAPT0 energy range because it is calculated in dielectric, which attenuates interactions. The three methods give well-correlated energies, with  $R^2$  values for linear regression ranging from 0.94 to 0.98; the two QM methods gave the highest  $R^2$  value. For all the close contacts, we locate bond critical points between the hypothesized hydrogen bond donor and

acceptor using QTAIM theory. The hydrogen bond energies, using the estimate of one half of the potential density at the bond critical point, range from -10.9 kcal/mol to -33.7 kcal/mol. The BCP energies are somewhat correlated with the overall interaction energy, with  $R^2$  values for linear regression ranging from 0.40 to 0.52. We also examine the three CHO hydrogen bonds that choline makes with nearby residues. These three interactions are longer than the close contacts, at 3.21 Å to 3.71 Å, and give correspondingly weaker interactions, with SAPT0 interaction energies ranging from -2.9 kcal/mol to 7.1 kcal/mol, B3LYP interaction energies ranging from -3.3 kcal/mol to -5.9 kcal/mol, and MM interaction energies ranging from -1.7 kcal/mol to -4.6 kcal/mol. For DNMT1, One challenge for simulating DNMT1 is the relatively low resolution of crystal structures and difficulty associated with solving crystal structures with multiple cofactors bound. In the initial structure of DNMT1, 100 close contact residue pairs are observed, but only around 25% have favorable interaction energies when evaluated with wavefunction theory (i.e., SAPT0) or DFT (i.e., B3LYP) (see session file provided in the ESI). It can be essential to carry out MD equilibration to improve the structure, but is known to not always lead to good treatment of non-covalent interactions. After equilibration, only five close contact residue pairs are observed, all with favorable interaction energies that correspond to likely hydrogen bonds. However, none of these close contacts were present in the initial crystal structure.

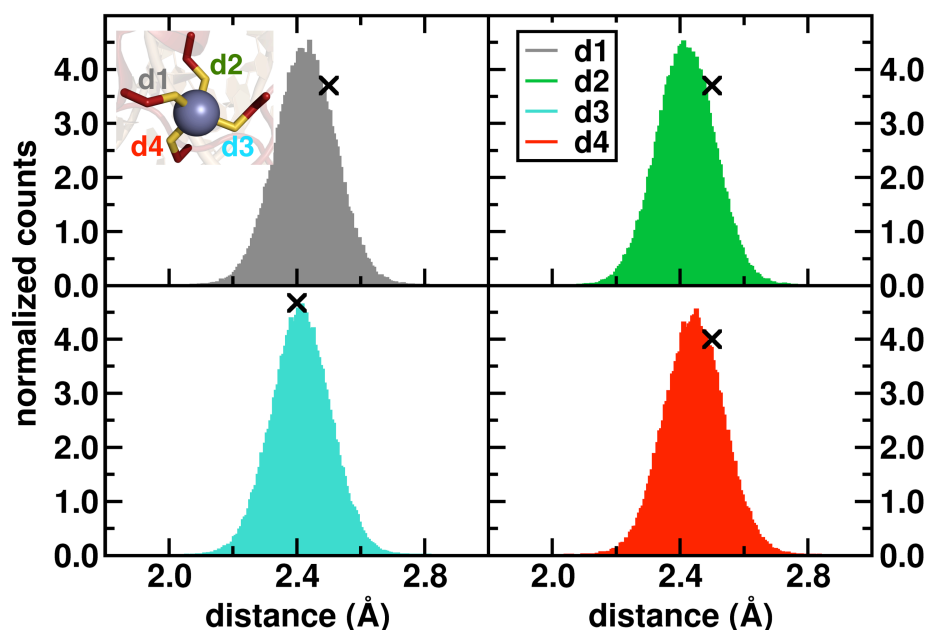

**Figure S9.** Bond distances d1, d2, d3 and d4 sampled between Zn2 and Cys13, Cys16, Cys19 and Cys51 (shown in colors gray, green, turquoise and red) respectively during 250 ns of production dynamics. The black crosses represent bond lengths obtained from QM-only optimizations of smaller cluster models containing 299 atoms.

**Table S10.** Radially-sized QM regions selected by including entire residues if any atom was within a fixed distance to the Zn<sup>2+</sup> center of the Zn2 site for 7 QM regions and distance cutoffs up to 10 Å. The QM region 5 was selected for QM-only cluster optimizations referred to in the main text. Each QM region is indicated by “Y” for residues included in it along with a total number of atoms, number of atoms including link hydrogen atoms, and the resulting net charge.

| Residue       | #At | Chg. | 1<br>(3 Å) | 2<br>(5 Å) | 3<br>(6 Å) | 4<br>(7 Å) | 5<br>(8 Å) | 6<br>(9 Å) | 7<br>(10 Å) |
|---------------|-----|------|------------|------------|------------|------------|------------|------------|-------------|
| Zn2           | 1   | 2    | Y          | Y          | Y          | Y          | Y          | Y          | Y           |
| Arg11         | 24  | 1    |            |            |            |            | Y          | Y          | Y           |
| Arg12         | 24  | 1    |            | Y          | Y          | Y          | Y          | Y          | Y           |
| Cys13         | 10  | -1   | Y          | Y          | Y          | Y          | Y          | Y          | Y           |
| Gly14         | 7   | 0    |            | Y          | Y          | Y          | Y          | Y          | Y           |
| Val15         | 16  | 0    |            | Y          | Y          | Y          | Y          | Y          | Y           |
| Cys16         | 10  | -1   | Y          | Y          | Y          | Y          | Y          | Y          | Y           |
| Glu17         | 15  | -1   |            |            | Y          | Y          | Y          | Y          | Y           |
| Val18         | 16  | 0    |            | Y          | Y          | Y          | Y          | Y          | Y           |
| Cys19         | 10  | -1   | Y          | Y          | Y          | Y          | Y          | Y          | Y           |
| Gln20         | 17  | 0    |            |            | Y          | Y          | Y          | Y          | Y           |
| Gln21         | 17  | 0    |            |            |            |            | Y          | Y          | Y           |
| Glu48         | 15  | -1   |            |            |            |            |            |            | Y           |
| Arg49         | 24  | 1    |            |            |            | Y          | Y          | Y          | Y           |
| Arg50         | 24  | 1    |            |            |            | Y          | Y          | Y          | Y           |
| Cys51         | 10  | -1   | Y          | Y          | Y          | Y          | Y          | Y          | Y           |
| Pro52         | 14  | 0    |            | Y          | Y          | Y          | Y          | Y          | Y           |
| Asn53         | 14  | 0    |            | Y          | Y          | Y          | Y          | Y          | Y           |
| Met54         | 17  | 0    |            |            | Y          | Y          | Y          | Y          | Y           |
| Ala55         | 10  | 0    |            |            |            |            | Y          | Y          | Y           |
| Lys775        | 22  | 1    |            |            |            |            |            |            | Y           |
| Phe852        | 20  | 0    |            |            |            |            |            |            | Y           |
| Cys859        | 11  | 0    |            |            |            |            |            |            | Y           |
| Asn889        | 14  | 0    |            |            |            |            |            |            | Y           |
| Glu891        | 15  | -1   |            |            |            |            | Y          | Y          | Y           |
| Met893        | 17  | 0    |            |            |            |            |            | Y          | Y           |
| Gly894        | 7   | 0    |            |            |            |            |            |            | Y           |
| <b>Totals</b> |     |      |            |            |            |            |            |            |             |
| # At.         |     |      | 41         | 132        | 181        | 229        | 295        | 312        | 401         |
| # At. w/ link |     |      | 49         | 138        | 185        | 233        | 299        | 320        | 417         |
| Charge        |     |      | -2         | -1         | -2         | 0          | 0          | 0          | 0           |

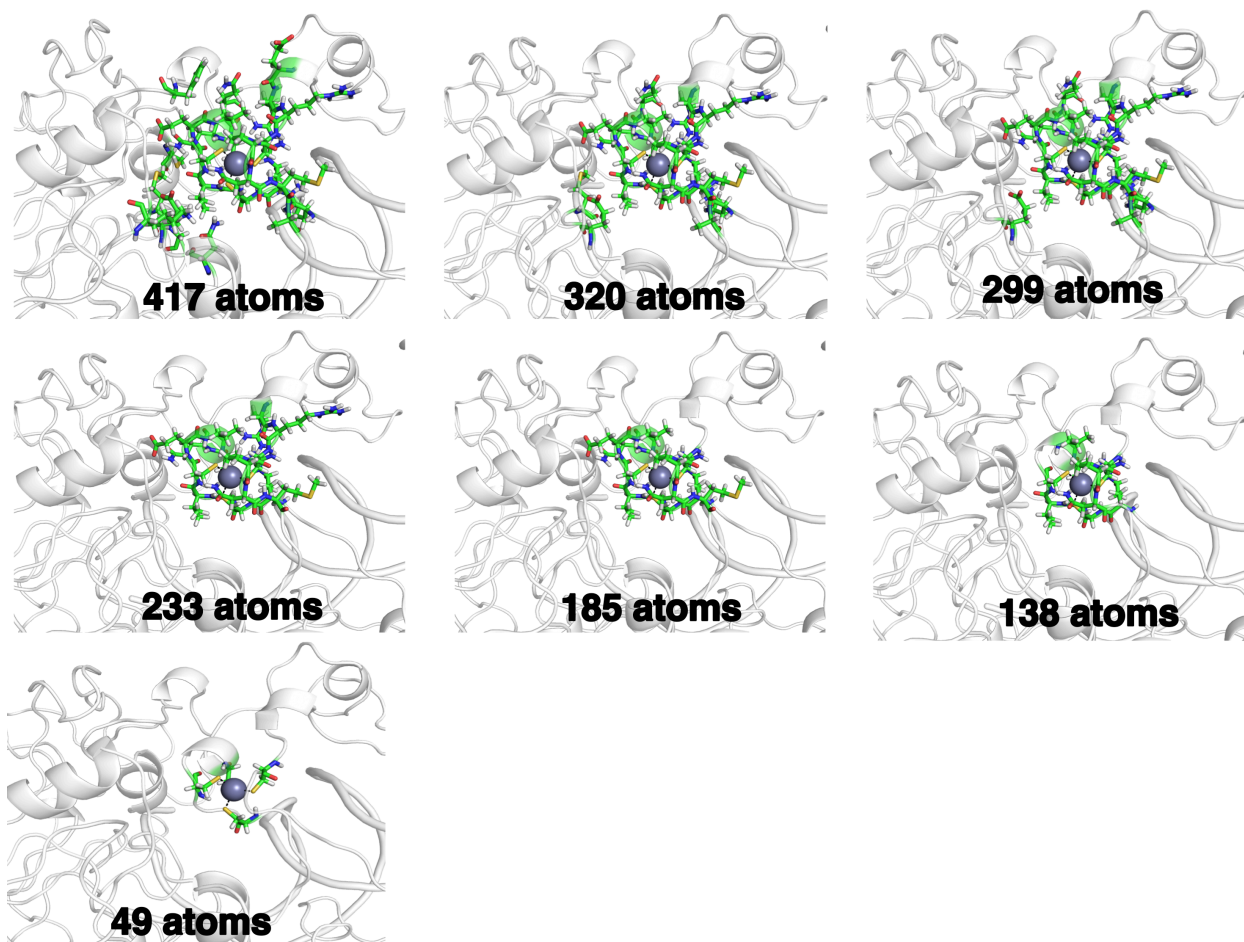

**Figure S10.** Stick representation models of QM residues in QM regions for Zn<sup>2+</sup> with number of atoms including link atoms shown in insets. The residues in QM region are shown as colored sticks, and the surrounding protein treated with MM is shown as grey cartoon. The bonds between zinc ions and coordinating residues are shown as dashed black lines.

**Table S11.** Charge redistribution upon removal of Zn from Zn2 site with largest QM region containing 417 atoms for snapshot at 34 ns from production dynamics of DNMT.  $q_{\text{Zn-DNMT}}$  represents charge on residue in presence of Zn2,  $q_{\text{DNMT}}$  represents charge on residue after zinc removal and the difference is given as  $\Delta q$ .

| Residue | $q_{\text{Zn-DNMT}}$ | $q_{\text{DNMT}}$ | $\Delta q$ |
|---------|----------------------|-------------------|------------|
| ZN2     | 0.49                 | -                 | -          |
| ARG11   | 0.60                 | 0.57              | 0.03       |
| ARG12   | 0.85                 | 0.65              | 0.20       |
| CYS13   | -0.57                | -0.81             | 0.24       |
| GLY14   | 0.01                 | -0.03             | 0.05       |
| VAL15   | -0.05                | -0.13             | 0.09       |
| CYS16   | -0.56                | -0.68             | 0.11       |
| GLU17   | -0.99                | -1.09             | 0.10       |
| VAL18   | 0.03                 | -0.05             | 0.08       |
| CYS19   | -0.65                | -0.70             | 0.05       |
| GLN20   | -0.06                | -0.12             | 0.06       |
| GLN21   | -0.19                | -0.18             | -0.01      |
| GLU48   | -1.43                | -1.45             | 0.02       |
| ARG49   | 1.00                 | 1.01              | -0.01      |
| ARG50   | 0.99                 | 0.91              | 0.08       |
| CYS51   | -0.52                | -0.70             | 0.18       |
| PRO52   | 0.02                 | -0.08             | 0.10       |
| ASN53   | 0.01                 | -0.02             | 0.04       |
| MET54   | -0.07                | -0.09             | 0.02       |
| ALA55   | -0.06                | -0.06             | 0.00       |
| LYS775  | 0.46                 | 0.46              | 0.00       |
| PHE852  | -0.46                | -0.46             | 0.00       |
| CYS859  | -0.53                | -0.53             | -0.01      |
| ASN889  | -0.54                | -0.53             | -0.02      |
| GLU891  | -1.54                | -1.53             | -0.01      |
| MET893  | -0.46                | -0.46             | 0.00       |
| GLY894  | -0.12                | -0.12             | 0.00       |
